# Supplementary material for: Metabonomic analysis of metastatic lung tissue in breast cancer mice by an integrated NMR-based metabonomics approach
Source: Royal Society of Chemistry journal article supplement (doi:10.1039/c7ra02069d), 2017-01-01

The HSQC and COSY spectra of lung tissue from a 12w MMTV-PyMT mice were presented for signals assignments.

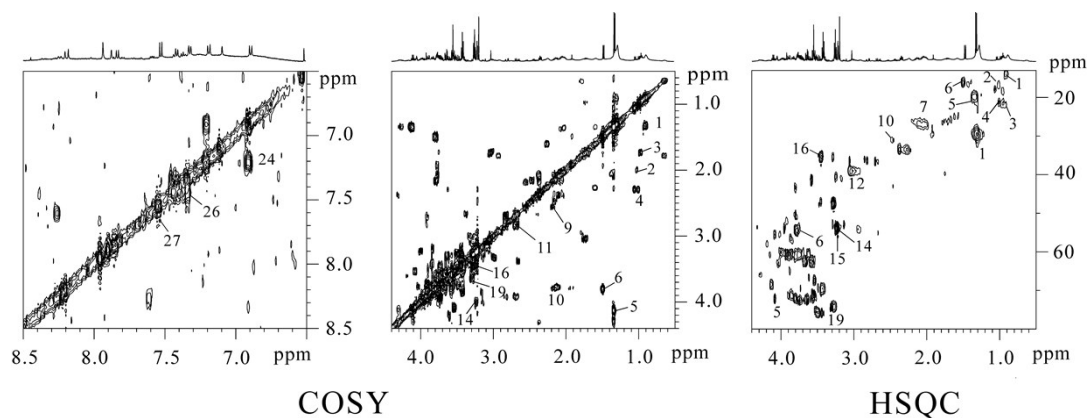

Supplement: c7ra02069d1.pdf [file c7ra02069d1.pdf]
